# Supplementary material
Source: PubMed Central journal article supplement (PMC16280)

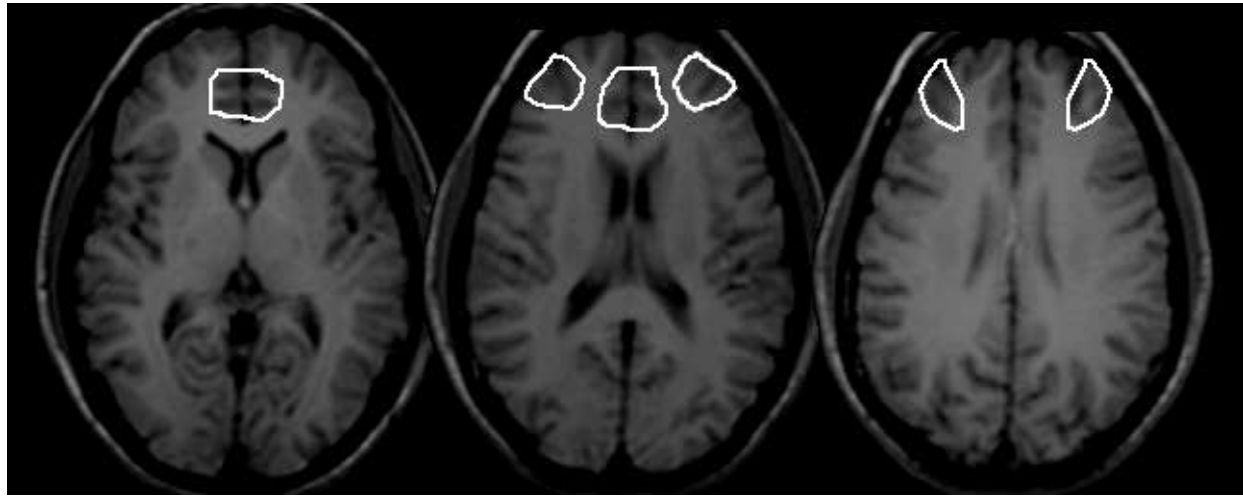

Supplement: pnas_060588897_4.pdf [file pnas_060588897_4.pdf]

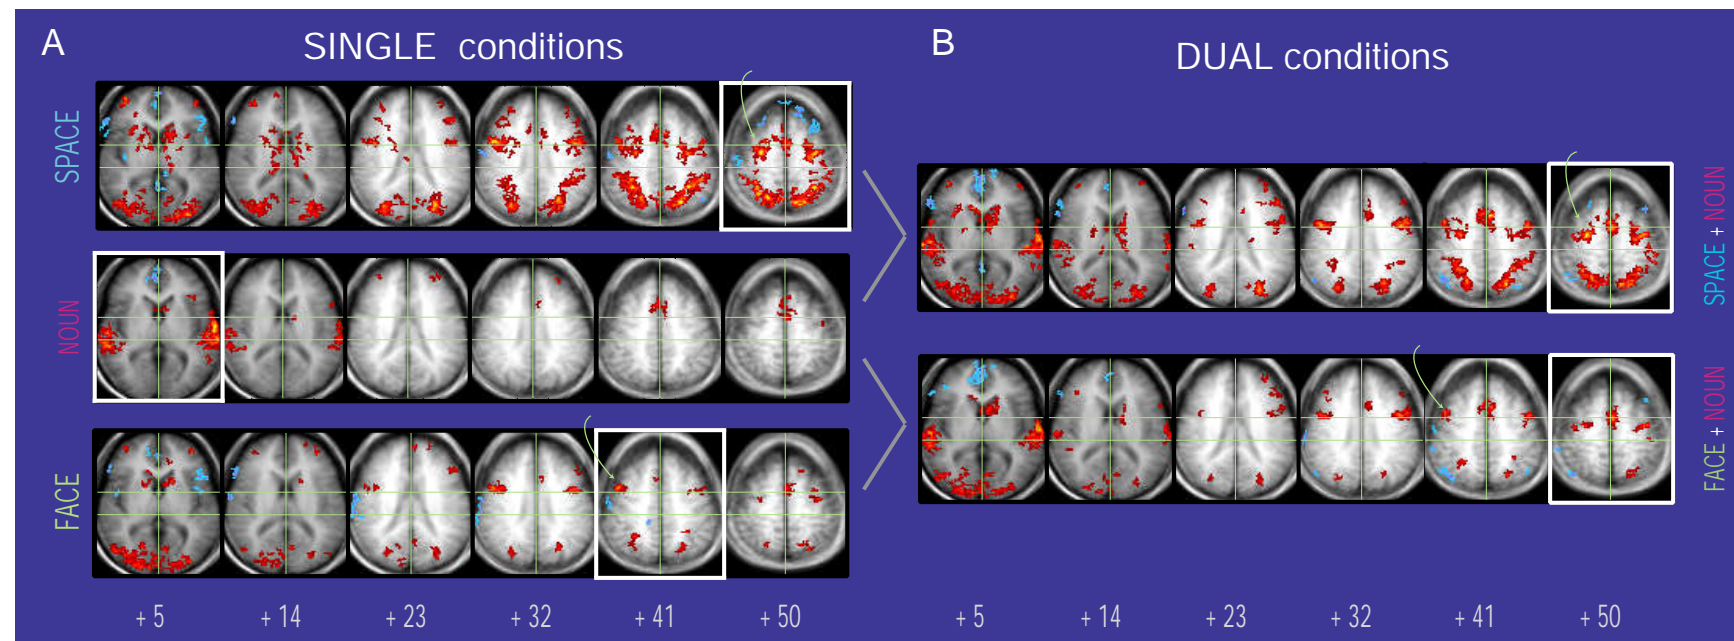

Supplement: pnas_060588897_5.pdf [file pnas_060588897_5.pdf]
